# Supplementary material for: Metabolomic Signature Discriminates Normal Human Cornea from Keratoconus—A Pilot GC/MS Study
Source: PubMed Central journal article supplement (PMC7356237; doi:10.3390/molecules25122933), 2020-06-25
Supplement: molecules-25-02933-s001.pdf [file molecules-25-02933-s001.pdf]

Supplementary material

# Metabolomic Signature Discriminates Normal Human Cornea from Keratoconus—A Pilot GC/MS Study

Anna Wojakowska <sup>1</sup>, Monika Pietrowska <sup>2</sup>, Piotr Widlak <sup>2</sup>, Dariusz Dobrowolski <sup>3,4</sup>,  
Edward Wylęgała <sup>4,5</sup> and Dorota Tarnawska <sup>5,6,\*</sup>

<sup>1</sup> European Centre for Bioinformatics and Genomics, Institute of Bioorganic Chemistry Polish Academy of Sciences, Noskowskiego12/14, 61-704 Poznan, Poland; astasz@ibch.poznan.pl

<sup>2</sup> Maria Skłodowska-Curie National Research Institute of Oncology, Gliwice Branch, Wybrzeże Armii Krajowej 15, 44-102 Gliwice, Poland; monika.pietrowska@io.gliwice.pl (M.P.); piotr.widlak@io.gliwice.pl (P.W.)

<sup>3</sup> Department of Ophthalmology & Tissue and Cells Bank, St. Barbara Hospital, Trauma Center, Plac Medyków 1, 41-200 Sosnowiec, Poland; dardobmd@wp.pl

<sup>4</sup> Chair and Clinical Department of Ophthalmology, Division of Medical Science in Zabrze, Medical University of Silesia, Panewnicka 65, 40-760 Katowice, Poland; wylegala@gmail.com

<sup>5</sup> Department of Ophthalmology, District Railway Hospital, Panewnicka 65, 40-760 Katowice, Poland

<sup>6</sup> Faculty of Science and Technology, Silesian Center for Education and Interdisciplinary Research, University of Silesia, 75 Pułku Piechoty 1A, 41-500 Chorzów, Poland

\* Correspondence: dorota.tarnawska@us.edu.pl

Received: 25 May 2020; Accepted: 22 June 2020; Published: date

**Table S1.** Metabolites identified and quantified by GC/MS in keratoconus (KC) and healthy cornea (HC) samples.

| No | Metabolite name     | Class                   | Mol. mass | Rt    | KC             |           | HC             |          |
|----|---------------------|-------------------------|-----------|-------|----------------|-----------|----------------|----------|
|    |                     |                         |           |       | mean abundance | S.D.      | mean abundance | S.D.     |
| 1  | Lactic acid         | $\alpha$ -hydroxy acids | 88        | 06.19 | 1.70E-04       | 1.73E-04  | 1.38E-04       | 1.64E-04 |
| 2  | Glycolic acid       | $\alpha$ -hydroxy acids | 88        | 06.34 | 2.65E-05       | 4.10E-05  | 6.18E-05       | 5.39E-05 |
| 3  | Oxalic acid         | Carboxylic acids        | 189       | 07.20 | 2.56E-04       | 3.039E-04 | 2.53E-04       | 2.01E-04 |
| 4  | Urea                | Others                  | 189       | 08.56 | 1.22E-03       | 9.00E-04  | 1.48E-03       | 4.71E-04 |
| 5  | Phosphoric acid     | Others                  | 299       | 09.21 | 6.77E-01       | 9.24E-02  | 5.69E-01       | 3.75E-02 |
| 6  | Glycerol            | Sugar alcohols          | 218       | 09.23 | 6.94E-04       | 4.70E-04  | 7.06E-04       | 4.99E-04 |
| 7  | 3-Indoleacetic acid | Others                  | 130       | 09.39 | 3.21E-03       | 1.15E-03  | 3.41E-03       | 1.30E-03 |
| 8  | Glycine             | Amino acids             | 174       | 09.51 | 3.48E-03       | 2.14E-03  | 5.33E-03       | 7.32E-03 |
| 9  | Succinic acid       | Carboxylic acids        | 147       | 09.58 | 5.36E-03       | 1.21E-03  | 7.71E-03       | 1.41E-03 |

|    |                                          |                         |     |       |          |          |          |          |
|----|------------------------------------------|-------------------------|-----|-------|----------|----------|----------|----------|
| 10 | Serine                                   | Amino acids             | 204 | 10.34 | 1.95E-03 | 2.38E-03 | 1.22E-03 | 3.95E-04 |
| 11 | Benzoic acid                             | Carboxylic acids        | 215 | 10.37 | 1.19E-03 | 4.38E-04 | 1.80E-03 | 4.05E-04 |
| 12 | Lactic acid dimer                        | $\alpha$ -hydroxy acids | 88  | 10.54 | 7.54E-05 | 7.56E-05 | 1.64E-04 | 8.12E-05 |
| 13 | L-Aspartic acid                          | Amino acids             | 232 | 12.38 | 3.45E-04 | 4.07E-04 | 1.90E-04 | 5.52E-05 |
| 14 | L-5-Oxoproline                           | Amino acids             | 156 | 12.39 | 6.29E-03 | 9.94E-03 | 2.61E-03 | 8.44E-04 |
| 16 | Octanoic acid 2-ethylhexyl ester         | Fatty acid esters       | 84  | 14.53 | 3.62E-04 | 2.25E-04 | 4.63E-04 | 9.15E-05 |
| 17 | Azelaic acid                             | Carboxylic acids        | 317 | 15.51 | 9.17E-05 | 3.76E-05 | 1.38E-04 | 6.83E-05 |
| 18 | Citric acid                              | Carboxylic acids        | 273 | 16.03 | 2.51E-04 | 1.83E-04 | 4.47E-04 | 5.07E-04 |
| 19 | Myristic acid                            | Fatty acids             | 285 | 16.25 | 1.12E-03 | 3.94E-04 | 1.75E-03 | 3.06E-04 |
| 20 | D-Fructose                               | Saccharides             | 217 | 16.36 | 1.41E-03 | 1.12E-03 | 1.34E-03 | 4.90E-04 |
| 21 | D-Psicose                                | Saccharides             | 307 | 16.42 | 3.10E-04 | 1.92E-04 | 2.85E-04 | 9.51E-05 |
| 22 | D-Glucose                                | Saccharides             | 319 | 16.52 | 2.10E-03 | 2.18E-03 | 2.88E-03 | 7.89E-04 |
| 23 | Decanoic acid, 2-ethylhexyl ester        | Carboxylic acid esters  | 84  | 16.59 | 5.39E-04 | 2.58E-04 | 7.25E-04 | 1.85E-04 |
| 24 | Palmitic acid methyl ester               | Fatty acid esters       | 87  | 17.14 | 2.32E-03 | 1.04E-03 | 3.04E-03 | 6.91E-04 |
| 25 | Sorbitol                                 | Sugar alcohols          | 319 | 17.16 | 6.15E-04 | 7.34E-04 | 5.68E-05 | 4.93E-05 |
| 26 | Pentadecanoic acid                       | Fatty acids             | 117 | 17.26 | 7.43E-04 | 2.62E-04 | 1.22E-03 | 3.31E-04 |
| 27 | Hexadecanol                              | Alcohols                | 299 | 17.34 | 7.63E-04 | 1.88E-04 | 1.09E-03 | 1.80E-04 |
| 28 | Talose                                   | Saccharides             | 204 | 17.40 | 4.83E-04 | 4.25E-04 | 8.26E-04 | 5.60E-04 |
| 29 | Gluconic acid                            | Carboxylic acids        | 435 | 17.54 | 5.62E-06 | 7.30E-06 | N.D.     | N.D.     |
| 30 | Palmitoleic acid                         | Fatty acids             | 311 | 18.11 | 2.93E-04 | 1.45E-04 | 3.81E-04 | 2.08E-04 |
| 31 | Palmitic acid                            | Fatty acids             | 313 | 18.24 | 4.25E-02 | 1.57E-02 | 7.24E-02 | 1.26E-02 |
| 32 | Myo-Inositol                             | Sugar alcohols          | 305 | 18.47 | 9.41E-05 | 5.87E-05 | 1.49E-04 | 6.52E-05 |
| 33 | Stearic acid, methyl ester               | Fatty acid esters       | 87  | 19.11 | 1.16E-03 | 5.16E-04 | 1.50E-03 | 3.68E-04 |
| 34 | Linoleic acid                            | Fatty acids             | 337 | 19.55 | 3.88E-04 | 3.79E-04 | 1.03E-03 | 4.99E-04 |
| 35 | trans-9-Octadecenoic acid                | Fatty acids             | 84  | 19.59 | 1.35E-03 | 7.10E-04 | 9.30E-04 | 1.26E-03 |
| 36 | Petroselinic acid                        | Fatty acids             | 339 | 19.59 | N.D.     | N.D.     | 2.56E-03 | 3.24E-03 |
| 37 | trans-13-Octadecenoic acid               | Fatty acids             | 357 | 20.00 | 8.33E-04 | 1.71E-04 | 1.49E-03 | 2.11E-04 |
| 38 | Stearic acid                             | Fatty acids             | 341 | 20.13 | 4.81E-02 | 1.77E-02 | 7.44E-02 | 1.68E-02 |
| 39 | 3-Chloropropionic acid, heptadecyl ester | Others                  | 84  | 20.42 | 2.97E-04 | 1.39E-04 | 6.56E-04 | 1.31E-04 |
| 40 | Myo-Inositol phosphate                   | Others                  | 318 | 21.37 | 4.49E-03 | 4.41E-03 | 1.92E-03 | 5.32E-04 |
| 41 | Arachidic acid                           | Fatty acids             | 369 | 21.53 | 4.78E-04 | 1.96E-04 | 6.28E-04 | 1.35E-04 |
| 42 | Sucrose                                  | Saccharides             | 361 | 23.22 | 2.34E-03 | 8.76E-04 | 3.63E-03 | 1.27E-03 |
| 43 | Cholesterol chloroformate                | Sterol esters           | 368 | 24.31 | 8.70E-05 | 8.29E-05 | 4.96E-04 | 2.35E-04 |
| 44 | Cholesta-3,5-diene – isomer 1            | Sterols                 | 368 | 25.11 | 1.76E-04 | 1.63E-04 | 8.36E-04 | 4.03E-04 |
| 45 | Cholesta-3,5-diene – isomer 2            | Sterols                 | 368 | 25.27 | 8.55E-04 | 7.59E-04 | 4.21E-03 | 2.01E-03 |

|    |                        |               |     |       |          |          |          |          |
|----|------------------------|---------------|-----|-------|----------|----------|----------|----------|
| 46 | Cholesterol propionate | Sterol esters | 351 | 25.27 | 1.20E-06 | 1.85E-06 | N.D.     | N.D.     |
| 47 | Cholesterol            | Sterols       | 133 | 27.34 | 1.96E-02 | 1.51E-02 | 5.68E-02 | 1.52E-02 |

N.D. – not detected, Rt – retention time (min), S.D. – standard deviation.
